# Supplementary material for: The Impact of Pyrethroid Resistance on the Efficacy of Insecticide-Treated Bed Nets against African Anopheline Mosquitoes: Systematic Review and Meta-Analysis
Source: PLoS Med. 2014 Mar 18;11(3):e1001619. doi: 10.1371/journal.pmed.1001619 (PMC3958359; doi:10.1371/journal.pmed.1001619)
Supplement: Table S2 — Example of the form used to assess the eligibility of each study based on the inclusion criteria. (XLSX) [file pmed.1001619.s025.xlsx]

## Sheet: Sheet1
	Table S2. Example of the form used to assess the eligibility of each study based on the inclusion criteria
	Study Name:
	Criteria	Assessment	Comments
	Study method
	Did the study use a method appropriate to the inclusion criteria (i.e. experimental hut method, cone test or tunnel test)?	Yes No Unclear
		exclude
	Mosquito population
	Did the study test African Anopheline species?	Yes No Unclear
		exclude
	Was the insecticide resistance status/profile of the mosquitoes directly tested and reported at the time of the study for experimental hut methods?	Yes No Unclear
		exclude
	If using laboratory reared mosquitoes are they of known resistance status?	Yes No Unclear
		exclude
	Intervention
	Did the study include either a CTN or LLIN?	Yes No Unclear
		exclude
	If using a CTN was the insecticides used recommended by WHO and at the appropriate dose?	Yes No Unclear
		exclude
	If using a LLIN was the make of the net recommended (interim of full) by WHO?	Yes No Unclear
		exclude
	Did the study use a UTN as a control?	Yes No Unclear
		exclude
	Outcomes
	Did the study measure outcomes appropriate for the inclusion criteria?	Yes No Unclear
		exclude
	Decision
	Is the study eligible for inclusion?	Yes No Unclear
		Further discussion amongst authors required
	Name of author conducting the eligibility assessment	Date	Reason for inclusion
			Reason(s) for exclusion
	Name of author who checked the decision	Date
