# Supplementary material for: The Impact of Pyrethroid Resistance on the Efficacy of Insecticide-Treated Bed Nets against African Anopheline Mosquitoes: Systematic Review and Meta-Analysis
Source: PLoS Med. 2014 Mar 18;11(3):e1001619. doi: 10.1371/journal.pmed.1001619 (PMC3958359; doi:10.1371/journal.pmed.1001619)
Supplement: Table S7 — Risk of bias assessment for the included tunnel tests. (XLSX) [file pmed.1001619.s030.xlsx]

## Sheet: Sheet1
Study number	Study name	Comparability of mosquitoes in ITN and UTN groups.	Observers	Incomplete outcome data	Raw data
			blinded		reported for ITN and UTN groups
50	Chandre 2000 (L1 Kisumu) [49]	low	unclear	low	low
51	Chandre 2000 (L1 Kou) [49]	low	unclear	low	low
52	Chandre 2000 (L1 Tola) [49]	low	unclear	low	low
53	Chandre 2000 (L2 Kisumu)a [49]	low	unclear	low	low
53	Chandre 2000 (L2 Kisumu)b [49]	low	unclear	low	low
54	Chandre 2000 (L2 YFO)a [49]	low	unclear	low	low
54	Chandre 2000 (L2 YFO)b [49]	low	unclear	low	low
55	Corbel 2004 (Kis + VKPR)a [30]	low	unclear	low	low
55	Corbel 2004 (Kis + VKPR)b [30]	low	unclear	low	low
56	Corbel 2004 (Kisumu)a [30]	low	unclear	low	low
56	Corbel 2004 (Kisumu)b [30]	low	unclear	low	low
57	Corbel 2004 (VKPR)a [30]	low	unclear	low	low
57	Corbel 2004 (VKPR)b [30]	low	unclear	low	low
58	Malima 2008a [36]	low	unclear	low	low
58	Malima 2008b [36]	low	unclear	low	low
59	Malima 2009 (tunnel) [29]	low	unclear	low	low
60	Oxborough 2009a [49]	unclear	unclear	low	high
60	Oxborough 2009b [49]	unclear	unclear	low	high
60	Oxborough 2009c [49]	unclear	unclear	low	high
60	Oxborough 2009d [49]	unclear	unclear	low	high
Comparability of mosquitoes (high= baseline characteristics differed, low= baseline characteristics similar); observers blinded (high= not blinded, low= blinded); incomplete outcome data (high= outcome measured not on all mosquitoes, low= outcome measured on all mosquitoes); raw data reported for ITN and UTN groups (high=did not report number of mosquitoes in ITN or UTN group, low= did report num…
